# Supplementary material
Source: MDPI journal article supplement (https://www.mdpi.com/2311-5629/4/2/26)
Supplement: s1 [file s1]

## SUPPORTING INFORMATION

### Investigation of the catalytic performance of Pd/CNFs for hydrogen evolution from additive-free formic acid decomposition

Felipe Sanchez,<sup>a</sup> Davide Motta,<sup>a</sup> Ludovica Bocelli,<sup>b</sup> Stefania Albonetti,<sup>b</sup> Alberto Roldan,<sup>a</sup> Ceri Hammond,<sup>a</sup> Alberto Villa<sup>c\*</sup> and Nikolaos Dimitratos<sup>a\*</sup>

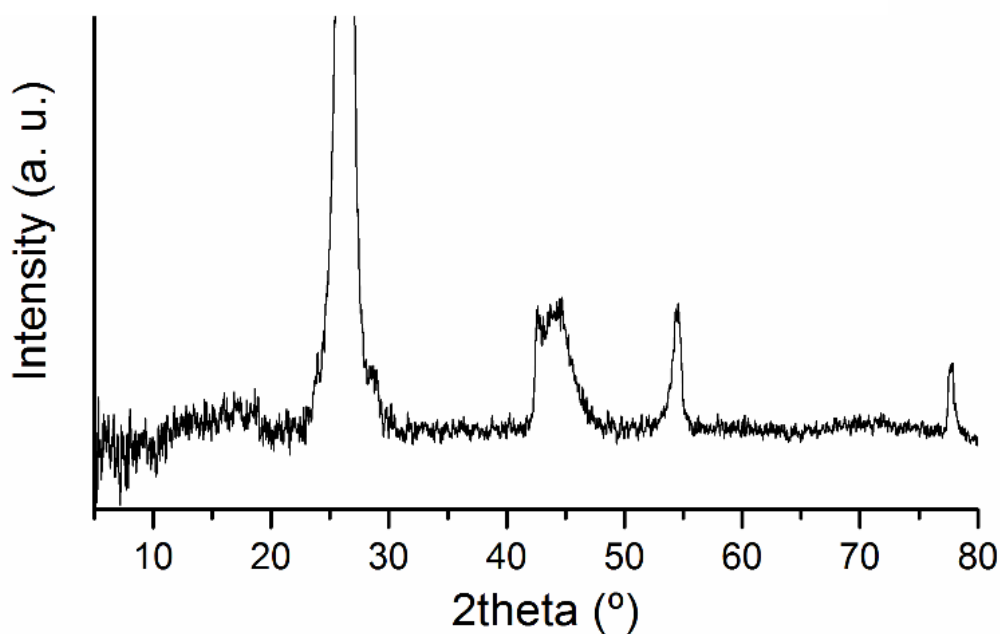

**Fig. S1** XRD pattern of the CNF support.

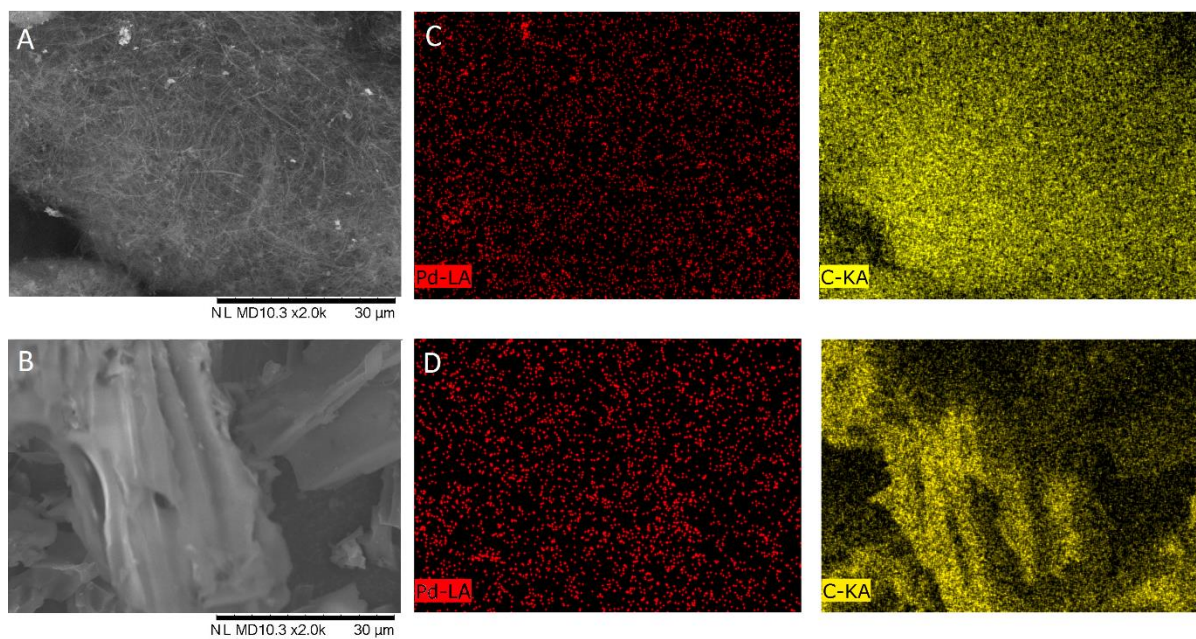

**Fig. S2** (A) SEM image of Pd<sub>IMP</sub>/CNF, (B) SEM image of Pd<sub>SI</sub>/AC, (C) Mapping-EDX images of Pd<sub>IMP</sub>/CNF (D) Mapping-EDX images of Pd<sub>SI</sub>/AC.

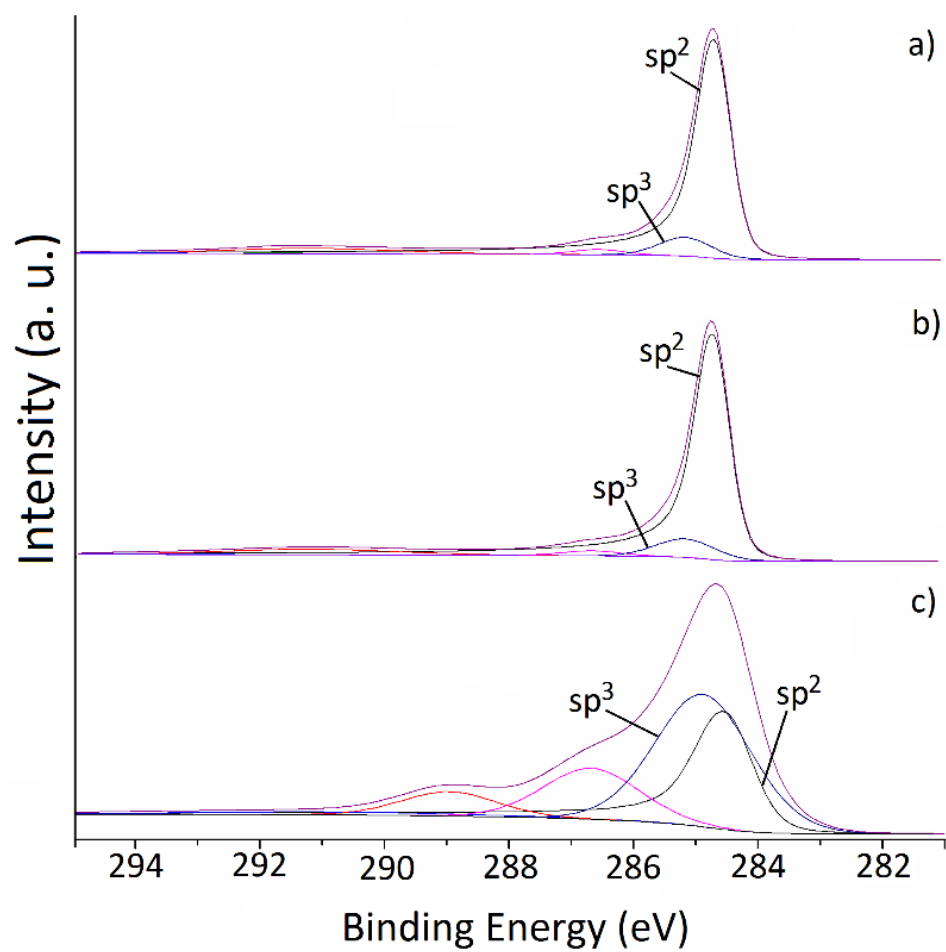

**Figure S3.** XPS spectra of (a) Pd<sub>IMP</sub>/CNF, (b) Pd<sub>SI</sub>/CNF and (c) Pd<sub>SI</sub>/AC in the binding energy region of 281–295 eV corresponding to C1s.

**Table S1** Atomic content of sp<sup>2</sup> and sp<sup>3</sup> carbon and ratio sp<sup>2</sup>/sp<sup>3</sup> from XPS for the catalysts subjected to different temperature treatments.

| Catalyst               | C sp <sup>2</sup> (%) | C sp <sup>3</sup> (%) | sp <sup>2</sup> /sp <sup>3</sup> |
|------------------------|-----------------------|-----------------------|----------------------------------|
| Pd <sub>IMP</sub> /CNF | 82.10                 | 7.50                  | 10.95                            |
| Pd <sub>SI</sub> /CNF  | 81.87                 | 8.11                  | 10.09                            |
| Pd <sub>SI</sub> /AC   | 31.87                 | 41.48                 | 0.77                             |

**Table S2** BET surface areas for the as-synthesised catalysts and supports.

| Catalyst | Support | IMP | SI |
|----------|---------|-----|----|
| Pd/CNF   | 34      | 37  | 36 |
| Pd/AC    | 64      | -   | 32 |

### Calculation of the number of surface exposed atoms

Calculations of the number of exposed surface atoms were performed by assuming that all the nanoparticles had cub-octahedral morphology with cubic close-packed structure in this size range, the model of full-shell nanoparticles was adopted.<sup>1</sup> The total number of the Au atoms in the cluster for a given cluster size can be calculated using the following equation (1):

$$d_{\text{sph}} = 1.105 d_{\text{at}} N_{\text{T}}^{1/3} \quad (1)$$

Where  $d_{\text{sph}}$  is the mean diameter of the Au particles obtained from TEM analysis and  $d_{\text{at}}$  is the atom diameter of Pd, 0.274 nm. The number of surface atoms ( $N_{\text{s}}$ ) and  $n$  can be calculated from equations (2) and (3), based on the values of  $N_{\text{T}}$ :

$$N_{\text{T}} = (10n^3 - 15n^2 + 11n - 3)/3 \quad (2)$$

$$N_{\text{s}} = 10n^2 - 20n + 12 \quad (3)$$

### Calculation of TOF based on the surface atoms

The TOF based on the surface atoms can then be calculated as follows:<sup>2</sup>

% of fraction of atoms lying at the surface:

$$A = (N_{\text{s}}/N_{\text{T}}) \times 100$$

TOF based on  $N_{\text{s}}$  = TOF(calculated for bulk gold using the nominal weight)/A

## References

1. K. Mori, T. Hara, T. Mizugaki, K. Ebitani, K. Kaneda, *JACS* 126 (2004) 10657-10666.
2. M. Comotti, C. Della Pina, R. Matarrese, M. Rossi, *Angew. Chem. Int. Ed.* 43 (2004) 5812-5815.
